# Supplementary material
Source: PubMed Central journal article supplement (PMC4096368)
Supplement: 207ca13e0f30ce770f4fc3edce52ae2c_genetics.113.160259-8.pdf [file 207ca13e0f30ce770f4fc3edce52ae2c_genetics.113.160259-8.pdf]

## Genotype-Genital Phenotype Correlation in XY<sup>POS</sup> Adults

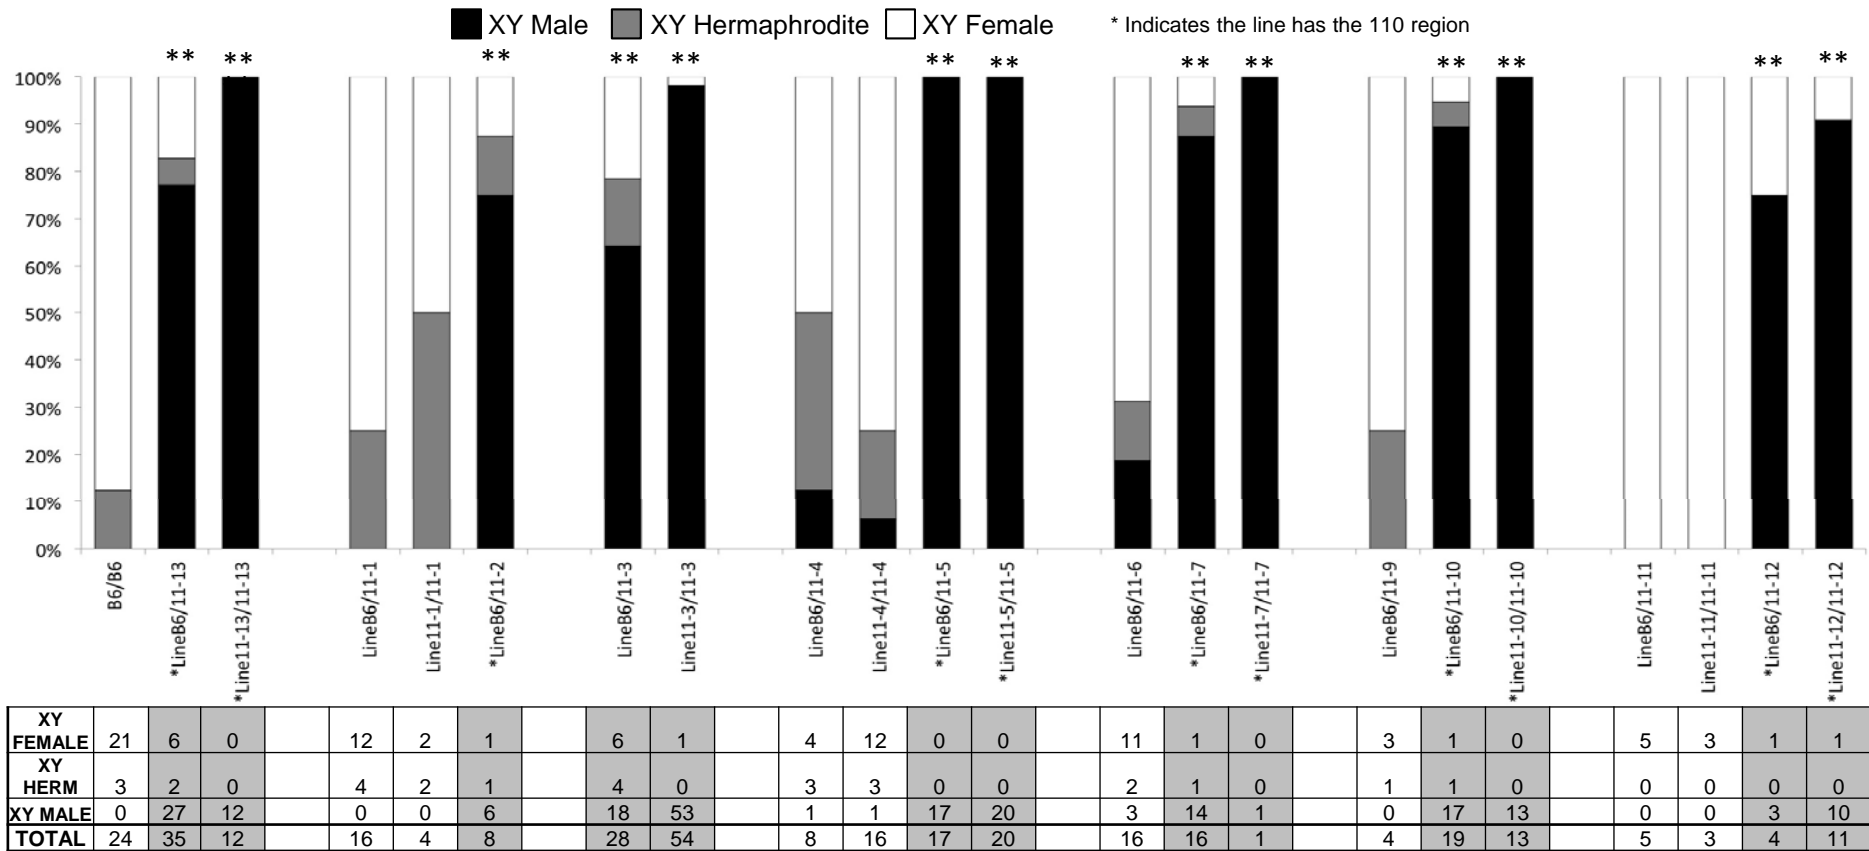

\*\* Fisher exact test p-value <0.001 compared to B6/B6

**Figure S1 Genotype/genital phenotype correlation in XY<sup>POS</sup> adults shows that the 110 region promotes male sex determination on a B6-Y<sup>POS</sup> background.** Adult XY<sup>POS</sup> animals that were heterozygous or homozygous for different lines were analyzed for their genital phenotype. All strains were compared to B6/B6-Y<sup>POS</sup> and animals that were heterozygous for congenic regions, which did not contain the 110 region. An asterisk (\*) refers to the presence of the 110 region within the congenic line and a double asterisk (\*\*) refers to Fisher exact test p-value < 0.01. In all strains, only lines that carried the 110 region were significantly protected against sex reversal. Only a total of 5 animals were found to be phenotypically male, even in the absence of the 110 region (see LineB6/11-4, Line11-4/11-4, and LineB6/11-6). The number of animals analyzed in each group is shown below the graph, and lines that are either heterozygous or homozygous for the 110 region are highlighted in grey.
