# Supplementary material
Source: PubMed Central journal article supplement (PMC4096368)
Supplement: 795d07504d58e6a7aafa07607367b47d_genetics.113.160259-4.pdf [file 795d07504d58e6a7aafa07607367b47d_genetics.113.160259-4.pdf]

# A

## Mouse Diversity Array Analysis of B6.Line12- $Y^{POS}$ versus wild-derived strains

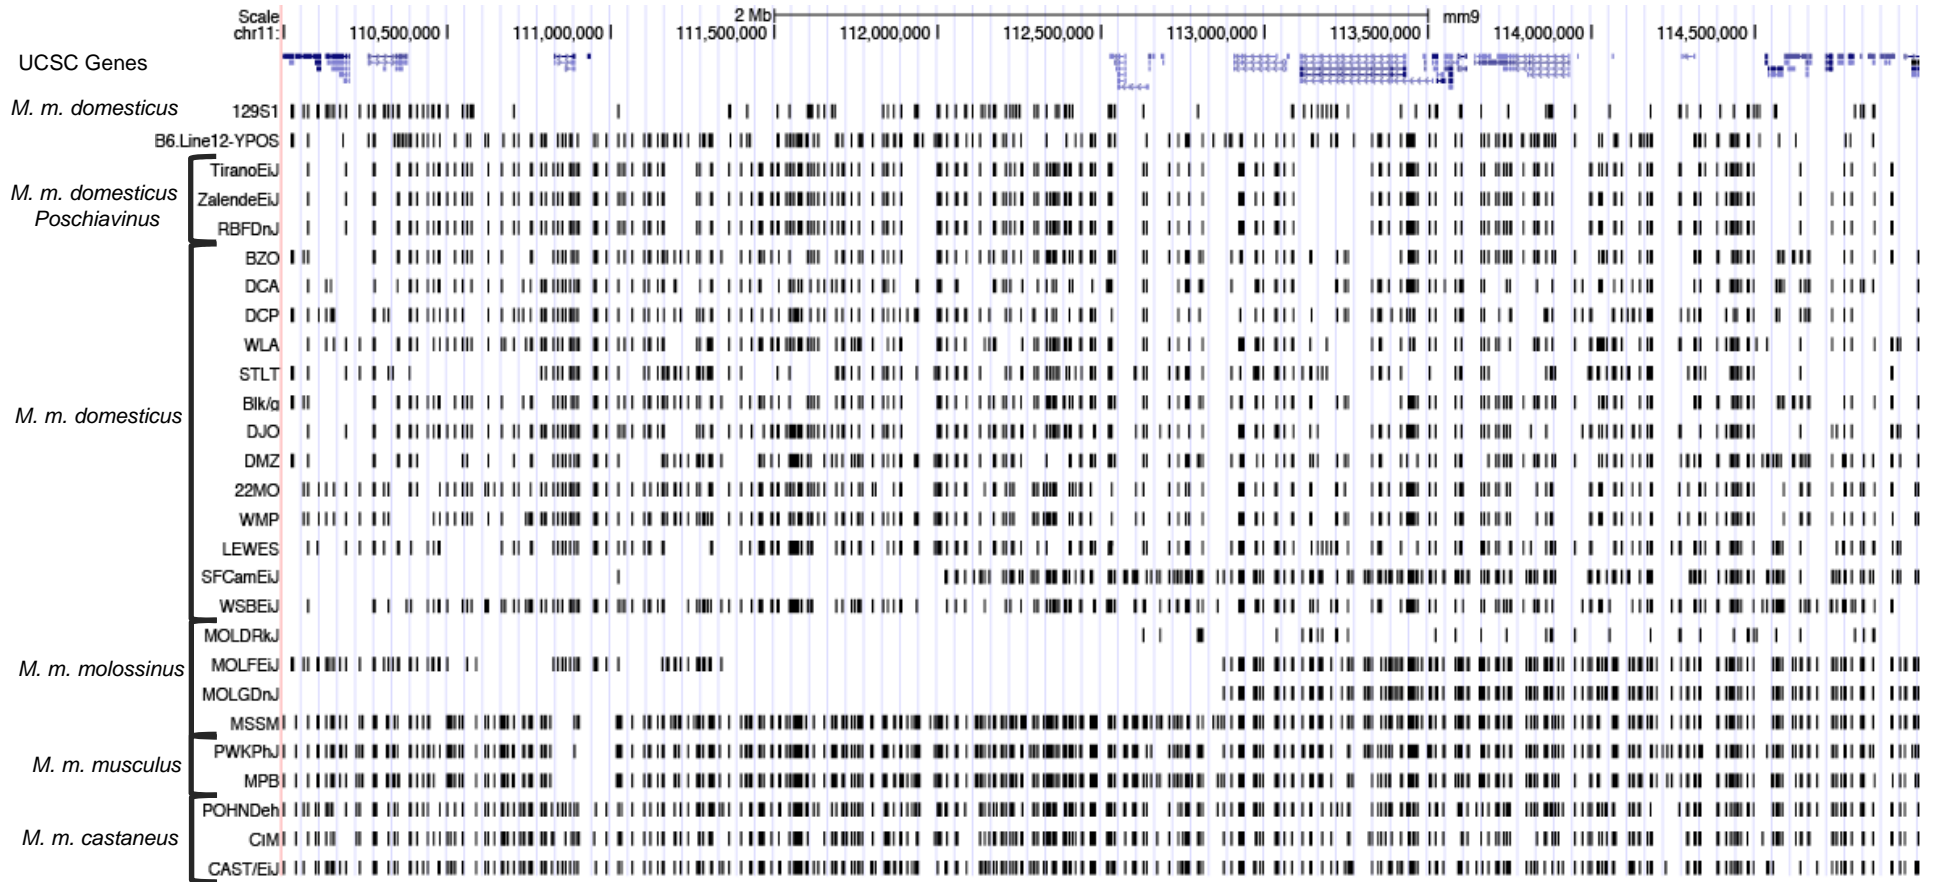

# B

## Mouse Diversity Array Analysis of B6.Line12-Y<sup>POS</sup> vs other *M. m. domesticus poschiavinus* strains

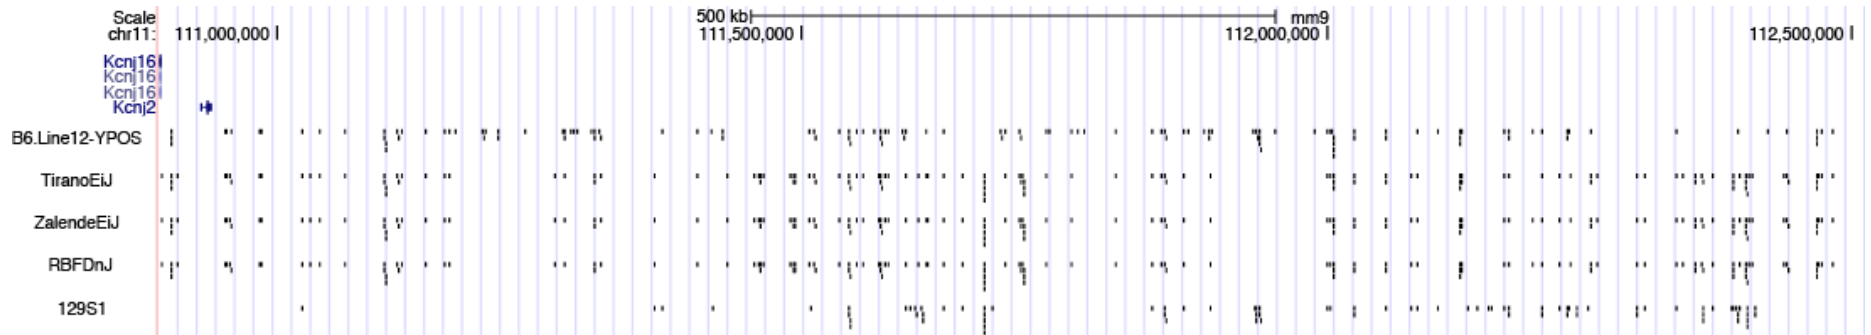

**Figure S3 Mouse Diversity array analysis of B6.Line12-Y<sup>POS</sup> versus wild-derived strains.** A) To identify the potential origins of the protective region, we compared Diversity Array data from the data from the 129 strain (top line) to our LineB6/11-13-Y<sup>POS</sup> protective congenic strain (2<sup>nd</sup> line), which contains only the 110 region, to and found that the Chromosome 11 110 region (shown here Chr11:110000000-115000000) is not derived from the 129 strain. Further analysis with array data from wild-derived strains of the 4 major subspecies of *M. musculus*: *domesticus*, *musculus*, *molossinus*, and *castaneus* identified significant similarity between 3 other typed *M. m. domesticus Poschiavinus* wild strains *Tirano*, *Zalende*, and *RBFDnJ* grouped under *M. m. domesticus Poschiavinus*. SNP data for the 129 and wild derived strains is obtained from <http://cgd.jax.org/datasets/popgen/diversityarray/yang2011.shtml>. B) In-depth analysis of the minimal overlap protective region derived from sub110-1 and sub110-2 (chr11:110,887,739-112,514,446) of the protected strain LineB6/11-13 and 3 genotyped animals from the *M. m. domesticus Poschiavinus* subspecies show significant similarity over the span of this non-coding region.
